# Supplementary material for: Effect of leaf position and days post-infiltration on transient expression of colorectal cancer vaccine candidate proteins GA733-Fc and GA733-FcK in Nicotiana benthamiana plant
Source: PeerJ journal article supplement (doi:10.7717/peerj.10851), 2021-04-07
Supplement: Revised_Figure_4._graph_raw_data.zip [file Revised_Figure_4._graph_raw_data.zip]

## Sheet: Sheet1
1st		W/O			W							W/O			W
		Top	Middle	Base	Top	Middle	Base					Top	Middle	Base	Top	Middle	Base
Days	1	30.01	35.91	5.07	77.4	73.9	74.15				1	36.1425	41.2725	3.245	65.9875	66.7525	61.6475
	3	40.57	59.35	5.71	91.01	93.1	61.62				3	41.1675	50.64	3.9275	74.5325	81.7325	66.3625
	5	64.72	58.01	5.94	191.62	166.03	68.65				5	71.9825	56.305	4.2975	162.413	166.89	61.82
	7	54.96	42.02	7.95	113.61	89.62	29.45				7	61.925	42.15	5.5575	95.4725	75.2225	55.2875
	8	37.8	55.88	4.99	181.08	95.15	50.17				8	47.84	52.6625	4.3925	150.428	99.815	60.9825
	9	42.56	69.43	7.37	177.41	126.6	45.03				9	44.8975	68.5175	4.9125	145.24	121.358	61.71
	10	36.12	49.91	8.09	136.71	99.4	59.86				10	39.7375	46.0275	6.1675	118.562	76.78	77.7725
										STDEV		W/O			W
												Top	Middle	Base	Top	Middle	Base
2nd		W/O			W						1	4.54633	4.44624	1.49311	10.9361	7.59304	14.7292
		Top	Middle	Base	Top	Middle	Base				3	1.02932	7.49504	1.54027	11.1387	11.8551	14.4449
	1	36.59	46.53	3.86	70.57	56.01	40.56				5	6.14111	3.72221	1.33697	20.731	13.178	6.39859
	3	42.68	53.76	4.69	66.47	82.62	48.92				7	6.43464	5.42168	1.6664	12.605	10.1907	19.6637
	5	72.2	57.35	4.82	162.69	166.54	63.19				8	7.19026	3.1293	0.72757	20.6891	8.48869	12.3499
	7	60.61	45.5	5.33	89.92	68.97	76.74				9	5.67126	3.07677	2.05894	21.8598	7.34155	12.8208
	8	52.83	48.51	5.05	144.35	97.9	57.08				10	2.71507	5.65231	1.54476	12.7128	16.1462	15.1812
	9	47.74	65.85	5.57	139.66	115.13	59.15
	10	41.79	48.94	6.61	116.27	73.27	86.78
										STDEV/n^(1/2)		W/O			W
												Top	Middle	Base	Top	Middle	Base
											1	2.27317	2.22312	0.746553	5.46806	3.79652	7.36462
3rd		W/O			W						3	0.514658	3.74752	0.770134	5.56937	5.92754	7.22246
		Top	Middle	Base	Top	Middle	Base				5	3.07055	1.8611	0.668486	10.3655	6.58901	3.1993
	1	40.99	42.53	2.06	51.68	68.63	68.49				7	3.21732	2.71084	0.8332	6.30252	5.09536	9.83183
	3	40.47	42.18	2.9	69.94	65.2	72.3				8	3.59513	1.56465	0.363785	10.3446	4.24435	6.17494
	5	79.72	50.82	3.37	148.53	151.38	53.21				9	2.83563	1.53838	1.02947	10.9299	3.67077	6.41041
	7	70.52	34.55	4.8	84.84	67.15	60.84				10	1.35754	2.82615	0.772381	6.35641	8.07312	7.59058
	8	53.25	52.31	3.84	136.46	93.91	57.92
	9	51.08	66.32	4.19	134.59	114.96	74.74
	10	41.86	37.67	4.5	107.13	61.08	71.05			STDEV/n^(1/2)/2		W/O			W
												Top	Middle	Base	Top	Middle	Base
											1	1.13658	1.11156	0.373277	2.73403	1.89826	3.68231
											3	0.257329	1.87376	0.385067	2.78468	2.96377	3.61123
4th		W/O			W						5	1.53528	0.930552	0.334243	5.18274	3.2945	1.59965
		Top	Middle	Base	Top	Middle	Base				7	1.60866	1.35542	0.4166	3.15126	2.54768	4.91592
	1	36.98	40.12	1.99	64.3	68.47	63.39				8	1.79756	0.782324	0.181893	5.17229	2.12217	3.08747
	3	40.95	47.27	2.41	70.71	86.01	82.61				9	1.41782	0.769192	0.514734	5.46495	1.83539	3.20521
	5	71.29	59.04	3.06	146.81	183.61	62.23				10	0.678768	1.41308	0.386191	3.17821	4.03656	3.79529
	7	61.61	46.53	4.15	93.52	75.15	54.12
	8	47.48	53.95	3.69	139.82	112.3	78.76
	9	38.21	72.47	2.52	129.3	128.74	67.92
	10	39.18	47.59	5.47	114.14	73.37	93.4
