# Supplementary material for: Effect of leaf position and days post-infiltration on transient expression of colorectal cancer vaccine candidate proteins GA733-Fc and GA733-FcK in Nicotiana benthamiana plant
Source: PeerJ journal article supplement (doi:10.7717/peerj.10851), 2021-04-07
Supplement: Revised_Figure_6_Graph_Raw_data.zip [file Revised_Figure_6_Graph_Raw_data.zip]

## Sheet: Sheet1
1st																1st-1 absorbance										1st-2 absorbance
	1	2	3	4	5	6	7	8	9	10	11	12					50 ng	25 ng	12.5 ng	6.25 ng	3.125 ng	1.56 ng					50 ng	25 ng	12.5 ng	6.25 ng	3.125 ng	1.56 ng
EpCAM-FcM	0.432	0.284	0.195	0.162	0.173	0.177	0.044	0.046	0.047	0.046	0.046	0.048	450			GA733-FcM	0.2995	0.1515	0.0625	0.0295	0.0405	0.0445				GA733-FcM	0.2465	0.1065	0.0435	0.0285	0.0265	0.0205
	0.379	0.239	0.176	0.161	0.159	0.153	0.046	0.045	0.045	0.045	0.046	0.045	450
GA733-FcP	0.764	0.461	0.302	0.221	0.19	0.164	0.047	0.045	0.045	0.044	0.044	0.047	450			GA733-FcP	0.6315	0.3285	0.1695	0.0885	0.0575	0.0315				GA733-FcP	0.6425	0.3035	0.1865	0.0905	0.0405	0.0165
	0.775	0.436	0.319	0.223	0.173	0.149	0.048	0.048	0.046	0.046	0.045	0.047	450
GA733-FcKP	1.276	0.758	0.446	0.316	0.222	0.177	0.047	0.048	0.048	0.049	0.045	0.048	450			GA733-FcKP	1.1435	0.6255	0.3135	0.1835	0.0895	0.0445				GA733-FcKP	0.9165	0.4045	0.2265	0.1195	0.0455	0.0205
	1.049	0.537	0.359	0.252	0.178	0.153	0.046	0.045	0.047	0.047	0.046	0.047	450
Positive control	0.129	0.049	0.067
	0.136	0.047	0.05		0.1325											2nd-1 absorbance										2nd-2 absorbance
																	50 ng	25 ng	12.5 ng	6.25 ng	3.125 ng	1.56 ng					50 ng	25 ng	12.5 ng	6.25 ng	3.125 ng	1.56 ng
2nd																GA733-FcM	0.3495	0.1115	0.0785	0.0435	0.0135	0.0235				GA733-FcM	0.3545	0.1315	0.0615	0.0365	0.0185	0.0125
	1	2	3	4	5	6	7	8	9	10	11	12
EpCAM-FcM	0.542	0.304	0.271	0.236	0.206	0.216	0.043	0.044	0.048	0.046	0.05	0.043	450			GA733-FcP	0.5365	0.2425	0.1165	0.0715	0.0275	0.0095				GA733-FcP	0.4925	0.2185	0.1085	0.0775	0.0225	-0.0025
	0.547	0.324	0.254	0.229	0.211	0.205	0.045	0.043	0.043	0.044	0.047	0.043	450
GA733-FcP	0.729	0.435	0.309	0.264	0.22	0.202	0.042	0.045	0.044	0.044	0.043	0.048	450			GA733-FcKP	0.9105	0.4835	0.2405	0.0985	0.0565	0.0295				GA733-FcKP	0.9455	0.4345	0.2415	0.1205	0.0685	0.0545
	0.685	0.411	0.301	0.27	0.215	0.19	0.044	0.043	0.043	0.044	0.044	0.044	450
GA733-FcKP	1.103	0.676	0.433	0.291	0.249	0.222	0.043	0.044	0.044	0.043	0.043	0.043	450
	1.138	0.627	0.434	0.313	0.261	0.247	0.047	0.057	0.047	0.046	0.047	0.057	450			3rd-1 absorbance										3rd-2 absorbance
Positive control	0.193	0.049	0.043														50 ng	25 ng	12.5 ng	6.25 ng	3.125 ng	1.56 ng					50 ng	25 ng	12.5 ng	6.25 ng	3.125 ng	1.56 ng
	0.192	0.05	0.077		0.1925											GA733-FcM	0.235	0.149	0.003	-0.048	-0.054	-0.044				GA733-FcM	0.261	0.055	-0.027	-0.062	-0.082	-0.067
3rd																GA733-FcP	0.45	0.192	0.036	-0.046	-0.075	-0.065				GA733-FcP	0.419	0.181	0.025	-0.049	-0.083	-0.085
	1	2	3	4	5	6	7	8	9	10	11	12
EpCAM-FcM	0.498	0.412	0.266	0.215	0.209	0.219	0.043	0.044	0.042	0.042	0.046	0.043	450			GA733-FcKP	1.016	0.373	0.147	0.032	-0.042	-0.066				GA733-FcKP	0.709	0.22	0.113	0.024	-0.039	-0.062
	0.524	0.318	0.236	0.201	0.181	0.196	0.043	0.042	0.042	0.043	0.043	0.043	450
GA733-FcP	0.713	0.455	0.299	0.217	0.188	0.198	0.042	0.043	0.043	0.043	0.043	0.042	450
	0.682	0.444	0.288	0.214	0.18	0.178	0.043	0.042	0.042	0.042	0.043	0.042	450
GA733-FcKP	1.279	0.636	0.41	0.295	0.221	0.197	0.043	0.043	0.043	0.043	0.043	0.042	450
	0.972	0.483	0.376	0.287	0.224	0.201	0.042	0.042	0.043	0.043	0.045	0.043	450
Positive control	0.227	0.044	0.043													average absorbance
	0.299	0.048	0.044		0.263												50 ng	25 ng	12.5 ng	6.25 ng	3.125 ng	1.56 ng
																GA733-FcM	0.291	0.1175	0.037	0.00466667	-0.00616667	-0.00166667
																GA733-FcP	0.528667	0.244333	0.107	0.0388333	-0.00166667	-0.0158333
																GA733-FcKP	0.940167	0.4235	0.213667	0.0963333	0.0298333	0.0035
																standard deviation
																	50 ng	25 ng	12.5 ng	6.25 ng	3.125 ng	1.56 ng
																GA733-FcM	0.0520442	0.035798	0.040662	0.0467426	0.0495557	0.0436287
																GA733-FcP	0.0928626	0.0600089	0.066459	0.0672456	0.0611659	0.0475538
																GA733-FcKP	0.14283	0.133303	0.0723938	0.060157	0.0564089	0.053605
																standard error
																	50 ng	25 ng	12.5 ng	6.25 ng	3.125 ng	1.56 ng
																GA733-FcM	0.021247	0.0146145	0.0166002	0.0190826	0.020231	0.0178114
																GA733-FcP	0.037911	0.0244985	0.0271318	0.0274529	0.0249709	0.0194138
																GA733-FcKP	0.05831	0.0544207	0.0295547	0.024559	0.0230288	0.0218842
																error range
																	50 ng	25 ng	12.5 ng	6.25 ng	3.125 ng	1.56 ng
																GA733-FcM	0.0106235	0.00730725	0.0083001	0.00954128	0.0101155	0.00890568
																GA733-FcP	0.0189555	0.0122493	0.0135659	0.0137264	0.0124854	0.00970688
																GA733-FcKP	0.029155	0.0272104	0.0147773	0.0122795	0.0115144	0.0109421
